# Supplementary material for: Neural Parse Combination
Source: Springer Nature journal article supplement (doi:10.1007/s11390-017-1756-5), 2017-07-01
Supplement: 11390_2017_1756_MOESM1_ESM.pdf [file 11390_2017_1756_MOESM1_ESM.pdf]

# Neural Parse Combination

Lin-Er Yang, Mao-Song Sun, Yong Cheng, Jia-Cheng Zhang,  
Zheng-Hao Liu, Huan-Bo Luan, Yang Liu

Yang LE, SunMS, Cheng Y et al. Neural parse combination. JOURNAL OF COMPUTER SCIENCE AND TECHNOLOGY 32(4): 749–757 July 2017.

DOI 10.1007/s11390-017-1756-5

# Research problem

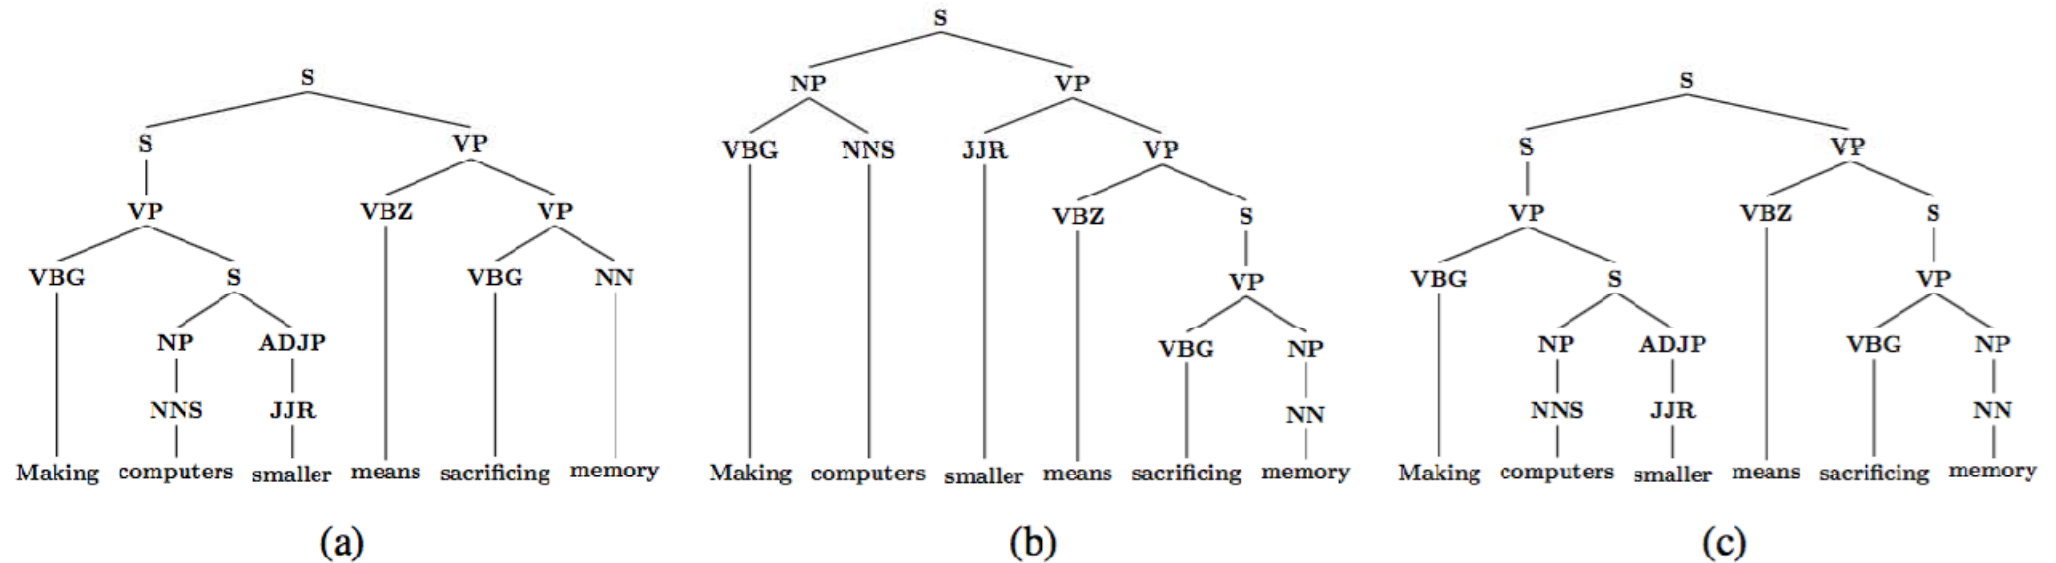

Fig. 1: (a) One candidate parse, (b) another candidate parse, and (c) the combined parse. Parser combination aims to integrate the strengths of individual parsers to yield more accurate parses.

# Kernel Contribution

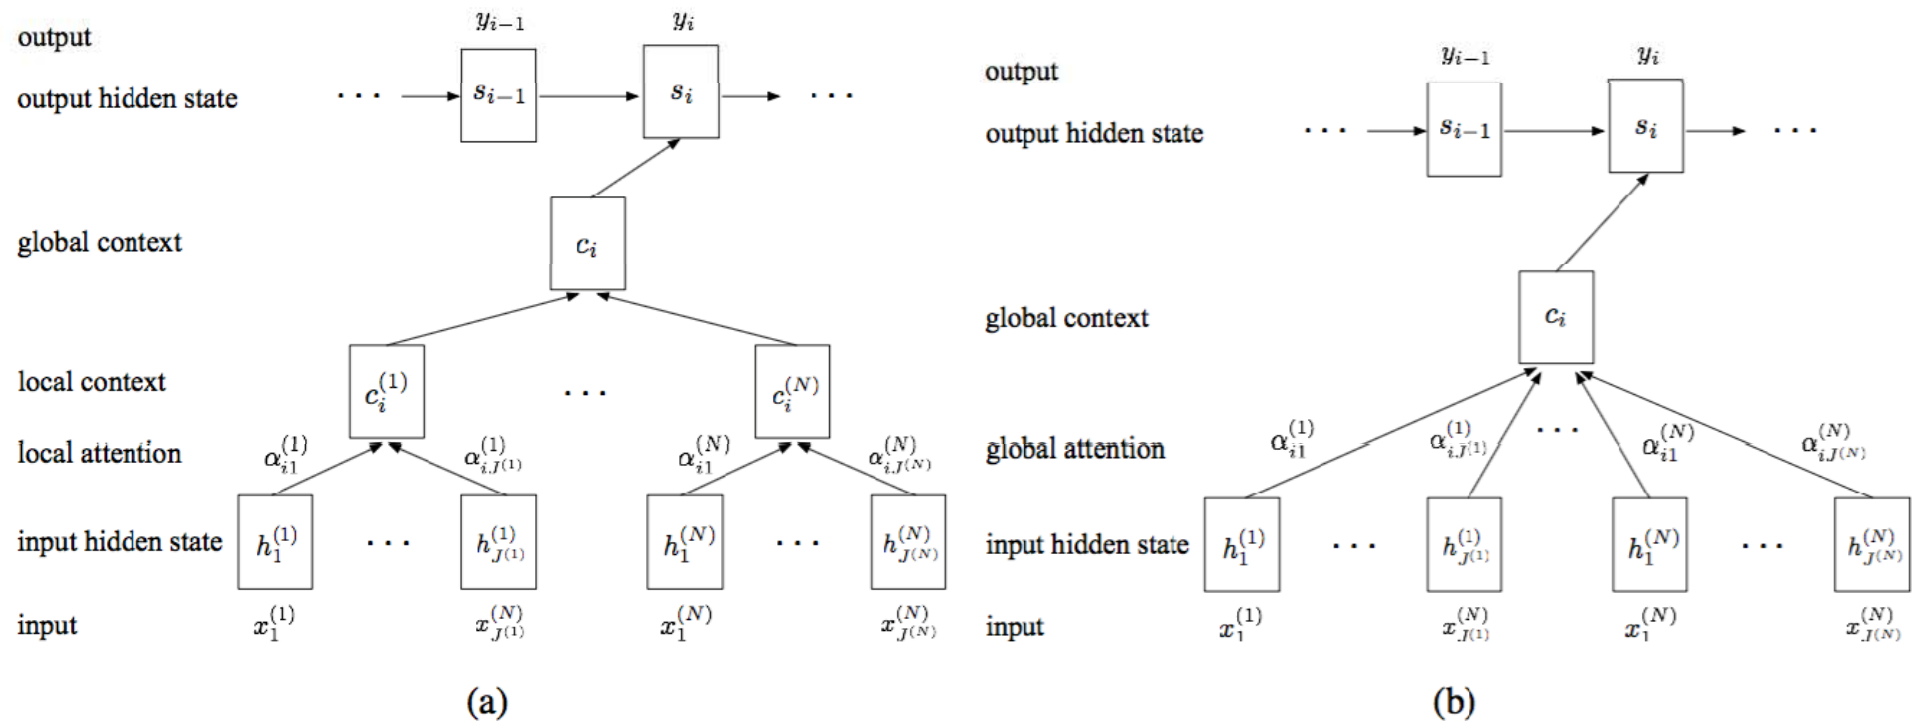

Fig. 2: (a) Local attention and (b) global attention. While local attention is normalized within each candidate parse, global attention is distributed among all candidate parses.

# Kernel Contribution

- Local Attention

$$\alpha_{ij}^{(n)} = \frac{\exp(a(\mathbf{s}_{i-1}, \mathbf{h}_j^{(n)}))}{\sum_{j'=1}^{J^{(n)}} \exp(a(\mathbf{s}_{i-1}, \mathbf{h}_{j'}^{(n)}))},$$

$$\mathbf{c}_i^{(n)} = \sum_{j=1}^{J^{(n)}} \alpha_{ij}^{(n)} \mathbf{h}_j^{(n)}.$$

local context vector

- Global Attention

$$\alpha_{ij}^{(n)} = \frac{\exp(a(\mathbf{s}_{i-1}, \mathbf{h}_j^{(n)}))}{\sum_{n=1}^N \sum_{j'=1}^{J^{(n)}} \exp(a(\mathbf{s}_{i-1}, \mathbf{h}_{j'}^{(n)}))}.$$

$$\mathbf{c}_i = \sum_{n=1}^N \sum_{j=1}^{J^{(n)}} \alpha_{ij}^{(n)} \mathbf{h}_j^{(n)}.$$

global context vector

# Results

**Table 3:** Comparison of  $F_1$  scores between individual and combined parsers.

| Type       | Parser         | Dev.  | Test         |
|------------|----------------|-------|--------------|
| individual | BERKELEY [5]   | 90.13 | 89.77        |
|            | ZPAR [32]      | 90.34 | 89.73        |
| combined   | REPARSING [21] | 90.41 | 90.35        |
|            | NEURALCOMB     | 91.32 | <b>90.86</b> |

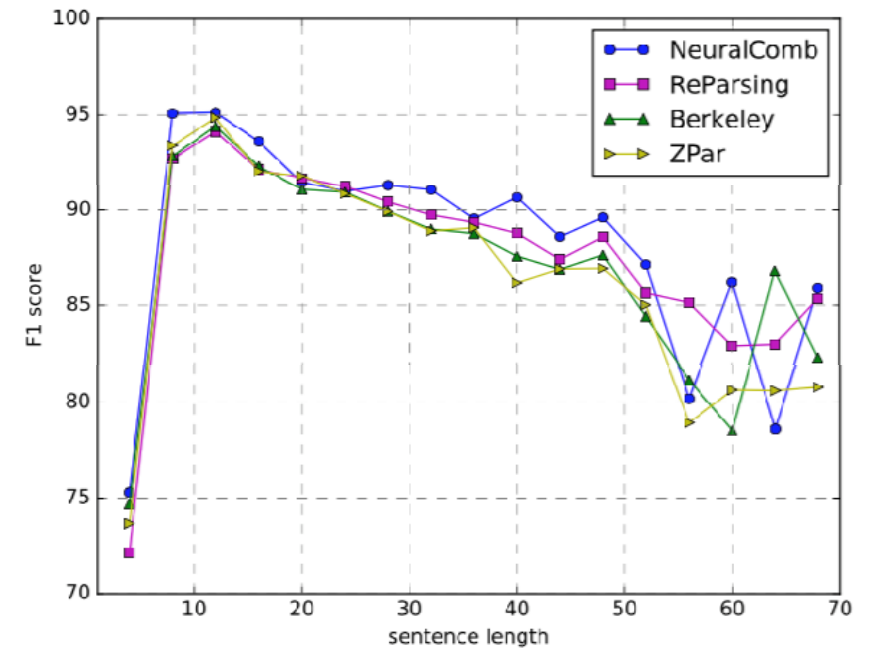

**Fig. 4:**  $F_1$  scores on the test set over various sentence lengths.
